# Supplementary material for: Mechanisms for hemodynamic instability related to renal replacement therapy: a narrative review
Source: Springer Nature journal article supplement (doi:10.1007/s00134-019-05707-w), 2019-08-12
Supplement: MOESM1 [file 17059780]

Table S1: Summary of Selected RRT-Related Factors on HIRRT

| **RRT-Related Factor** | **Proposed Physiologic Mechanism For HIRRT** | **Clinical Evidence of Association with HIRRT** |
| --- | --- | --- |
| **Dialyzer Bio-Incompatibility**  A cumulative measure of the interactions between the blood and a specific dialyzer membrane type. | Leukocyte and complement activation in the extracorporeal circuit occurs primarily at the dialyzer membrane where blood comes into contact with non-biological material but may also relate to the effects of sterilizing agents and other compounds leached from the extracorporeal circuit [1, 2]. For example, the sterilizing agent ethylene oxide was associated with IgE-mediated anaphylaxis related to its reactivity with the potting compound in the dialyzer [3-6] and is no longer used [7]. Complement activation results in activation of innate immunity, and the inflammatory response, with the potential to provoke HIRRT.  One particular membrane interaction of note, unrelated to complement activation, involves the propensity for negatively charged AN69 (polyacrylnitrile) dialyzers to result in bradykinin generation. While bradkinin can have a vasodilatory effect unto itself, normally it is rapidly degraded. When degradation is reduced in patients concurrently treated with angiotenin-converting-enzyme inhibitors (ACEi), unopposed bradykinin generation can result in anaphylaxis [8]. This reaction has also been reported to occur in rare patients concurrently being treated with an angiotensin II receptor blockers (ARBs) but the mechanism is unclear since ARBs should not result in impaired bradykinin breakdown.  Older membranes consisted of regenerated cellulose, which activated complement via interaction with the hydroxyl groups in the cellulose component [9]. Consequently, dialyzer membranes with synthetic polymers such as PS were created to limit or to minimize the biological reactions triggered by complement system activation [9]. It has also previously been demonstrated that platelet activation and consequent release of reactive oxygen species (which could provoke HIRRT) occurs due to platelet interaction with the dialyzer membrane [10]. This was shown to occur to a greater degree with membranes that are hydrophobic (such as PS and PMMA) than with ones that are hydrophilic (such as those made of regenerated cellulose or ethylene vinylalcohol copolymer) [10]. As such, membrane bio-incompatibility involves more than just whether or not it is ‘synthetic’. | While unmodified cellulose-based (cuprophan) dialyzers are associated with more HIRRT [11] and, in the critically ill population with AKI shown to be associated with reduced kidney recovery [12], they are no longer being routinely used in clinical practice. Other than the negative impact of unmodified cellulose dialyzers, several meta-analyses have reported that kidney recovery and patient survival does not differ with synthetic membrane versus modified cellulose membrane dialyzers in patients with AKI [13-15].  Regarding the AN69-related anaphylaxis that can occur in some patients on ACEi (or possibly ARB): some AN69 membranes are now surface-coated with polycationic polymer(s) (AN69-ST) and this reduces the bradykinin-related reaction that otherwise can occur in some patients on ACEi [16]. AN69 membranes are still available for use with CRRT however bradykinin generation on the membrane is blunted/prevented by the rinsing of the blood and dialysate compartments of AN69 dialyzers with alkaline solution prior to use [17]. Clinicians should be aware of the possibility of this reaction in patients taking ACEis (or ARBs) who undergo CRRT using an AN69 dialyzer. |
| **Solute Clearance**  Use of Convective Clearance Modes to Remove Larger Molecular Weight Pro-Inflammatory Mediators | Convective clearance delivered by hemofiltration (due to the hydrostatic pressure gradient across the dialyzer membrane) can facilitate the removal of more higher molecular weight solutes than hemodialysis (which utilizes diffuse clearance). Hemodialysis removes low molecular weight solutes but has limited clearance of higher molecular weight solutes [18]. Consequently, it has been postulated that dialysis modalities that utilize convective clearance may cause less HIRRT compared to those that utilize only diffusive clearance due to removal of larger molecular-weight pro-inflammatory mediators and a consequent improvement in vascular tone [19]. | The evidence is very limited with respect to clinical outcomes for RRT modalities that utilize convective solute clearance (e.g., CVVH or CVVHDF) versus only diffusive clearance (e.g. CVVHD). A randomized trial of CVVH versus CVVHD in critically ill patients with AKI and hemodynamic instability with a prescribed effluent rate of 35mL/kg/hr suggested a trend towards reduced vasopressor requirements in the CVVH group although mortality and RRT-dependence in survivors at 60 days were similar [20]. A systematic review of 19 RCTs in AKI (10 parallel and 9 cross-over design, that included 720 patients in total, compared hemofiltration versus hemodialysis. Of these studies,16 employed CRRT. Overall, no clinical benefits of hemofiltration (i.e. convective clearance) were detected [21]. Although the clearance of mid to high molecular weight solutes was increased with hemofiltration, few studies assessed the serum concentrations of cytokines [21]. Overall, there is no evidence to recommend the use of, or addition of, convective clearance to reduce HIRRT and there is no evidence to recommend one CRRT modality (i.e. CVVH; CVVHD; CVVHDF), over another with respect to hemodynamic stability. |

HIRRT, hemodynamic instability related to renal replacement therapy; cAMP, cyclic adenosine monophosphate; iNOS, inducible nitric oxide synthase; NO, nitric oxide; CVVH, continuous venovenous hemofiltration; CVVHD, continuous venovenous hemodialysis; CVVHDF, continuous venovenous hemodiafiltration; AKI, acute kidney injury; IgE, immunoglobulin E; PS, polysulphone; PMMA, polymethlmethacrylate; RRT, renal replacement therapy; CRRT, continuous renal replacement therapy.

**REFERENCES:**

1. Patel S, Raimann JG, Kotanko P, (2017) The impact of dialysis modality and membrane characteristics on intradialytic hypotension. Seminars in Dialysis 30: 518-531

2. Haroon S, Davenport A, (2018) Choosing a dialyzer: What clinicians need to know. Hemodialysis international International Symposium on Home Hemodialysis 22: S65-S74

3. Heegard KD, Tilley MA, Stewart IJ, Edgecombe HP, Lundy JB, Renz EM, Chung KK, (2013) Anaphylactoid reaction during first hemofiltrationwith a PUREMA polysulfone membrane. The International journal of artificial organs 36: 363-366

4. Ansorge W, Pelger M, Dietrich W, Baurmeister U, (1987) Ethylene oxide in dialyzer rinsing fluid: effect of rinsing technique, dialyzer storage time, and potting compound. Artif Organs 11: 118-122

5. Muller TF, Seitz M, Eckle I, Lange H, Kolb G, (1998) Biocompatibility differences with respect to the dialyzer sterilization method. Nephron 78: 139-142

6. Dolovich J, Bell B, (1978) Allergy to a product(s) of ethylene oxide gas: demonstration of IgE and IgG antibodies and hapten specificity. The Journal of allergy and clinical immunology 62: 30-32

7. Saha M, Allon M, (2017) Diagnosis, Treatment, and Prevention of Hemodialysis Emergencies. Clinical journal of the American Society of Nephrology : CJASN 12: 357-369

8. Tielemans C, Madhoun P, Lenaers M, Schandene L, Goldman M, Vanherweghem JL, (1990) Anaphylactoid reactions during hemodialysis on AN69 membranes in patients receiving ACE inhibitors. Kidney international 38: 982-984

9. Kokubo K, Kurihara Y, Kobayashi K, Tsukao H, Kobayashi H, (2015) Evaluation of the biocompatibility of dialysis membranes. Blood Purif 40: 293-297

10. Itoh S, Susuki C, Tsuji T, (2006) Platelet activation through interaction with hemodialysis membranes induces neutrophils to produce reactive oxygen species. J Biomed Mater Res A 77: 294-303

11. Davenport A, Davison AM, Will EJ, (1993) Membrane biocompatibility: effects on cardiovascular stability in patients on hemofiltration. Kidney Int Suppl 41: S230-234

12. Hakim RM, Wingard RL, Parker RA, (1994) Effect of the dialysis membrane in the treatment of patients with acute renal failure. The New England journal of medicine 331: 1338-1342

13. Alonso A, Lau J, Jaber BL, (2008) Biocompatible hemodialysis membranes for acute renal failure. The Cochrane database of systematic reviews: CD005283

14. Jaber BL, Lau J, Schmid CH, Karsou SA, Levey AS, Pereira BJ, (2002) Effect of biocompatibility of hemodialysis membranes on mortality in acute renal failure: a meta-analysis. Clinical nephrology 57: 274-282

15. Subramanian S, Venkataraman R, Kellum JA, (2002) Influence of dialysis membranes on outcomes in acute renal failure: a meta-analysis. Kidney international 62: 1819-1823

16. Maheut H, Lacour F, (2001) Using AN69 ST membrane: a dialysis centre experience. Nephrology, dialysis, transplantation : official publication of the European Dialysis and Transplant Association - European Renal Association 16: 1519-1520

17. Coppo R, Amore A, Cirina P, Scelfo B, Giacchino F, Comune L, Atti M, Renaux JL, (2000) Bradykinin and nitric oxide generation by dialysis membranes can be blunted by alkaline rinsing solutions. Kidney international 58: 881-888

18. Depner TA, (2008) "Artificial" hemodialysis versus "natural" hemofiltration. Am J Kidney Dis 52: 403-406

19. Ronco C, Tetta C, Mariano F, Wratten ML, Bonello M, Bordoni V, Cardona X, Inguaggiato P, Pilotto L, d’Intini V, Bellomo R, (2003) Interpreting the mechanisms of continuous renal replacement therapy in sepsis: the peak concentration hypothesis. Artificial Organs 27: 792-801

20. Wald R, Friedrich JO, Bagshaw SM, Burns KEA, Garg AX, Hladunewich MA, House AA, Lapinsky S, Klein D, Pannu NI, Pope K, Richardson RM, Thorpe K, Adhikari NKJ, (2012) Optimal mode of clearance in critically ill patients with acute kidney injury (OMAKI) - a pilot randomized controlled trial of hemofiltration versus hemodialysis: a Canadian Critical Care Trials Group Project. Critical Care 16: R205

21. Friedrich JO, Wald R, Bagshaw SM, Burns KEA, Adhikari NKJ, (2012) Hemofiltration compared to hemodialysis for acute kidney injury: a systematic review and meta-analysis. Critical Care 16: R146
